# Supplementary material for: Phytocompounds and Regulation of Flavonoids in In Vitro-Grown Safflower Plant Tissue by Abiotic Elicitor CdCl2
Source: MDPI journal article supplement (doi:10.3390/metabo14020127), 2024-02-16

**Figure S1.** Flavonoid concentrations and calibration curve for quantification of analytes by UHPLC-MS/MS. From top to bottom: Quercetin, Rutin, Myricetin, Epicatechingallate, Kaempferol, Cyanidin, Delphinidin, Pelargonidin, Narenginin and Paonidin.

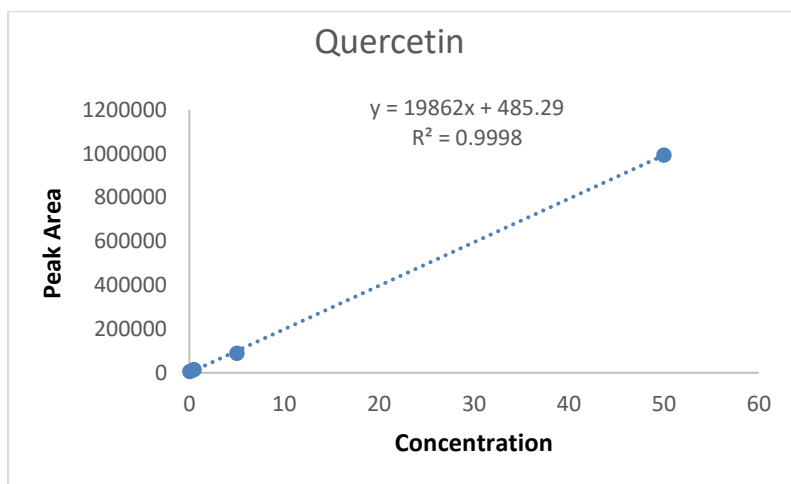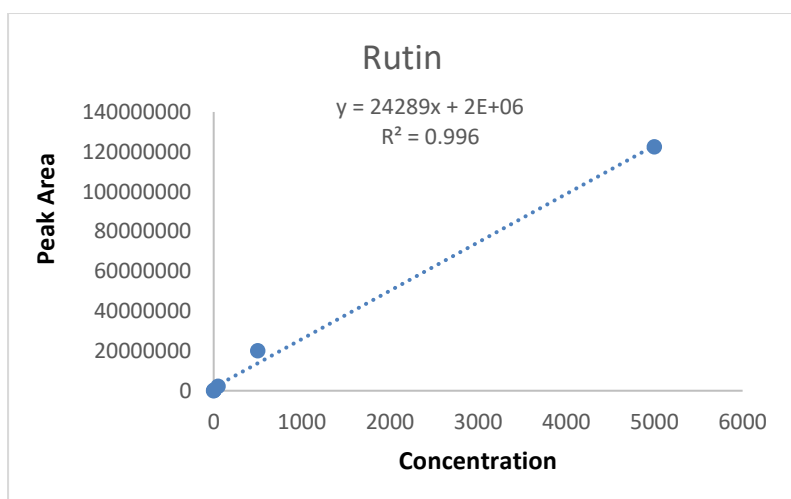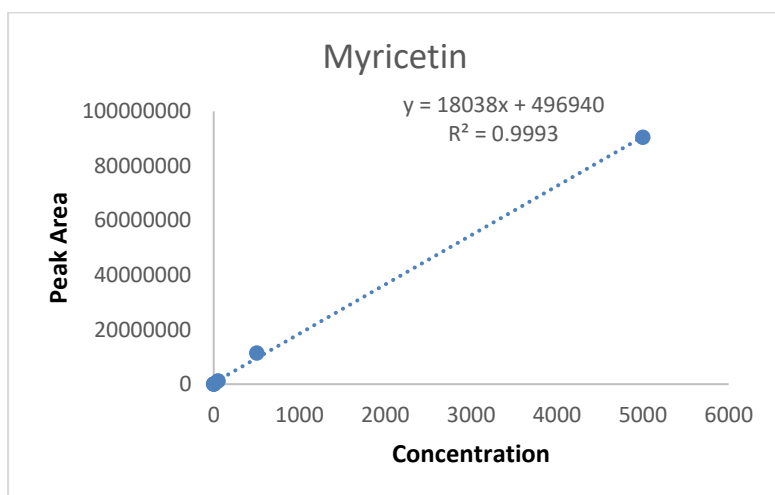

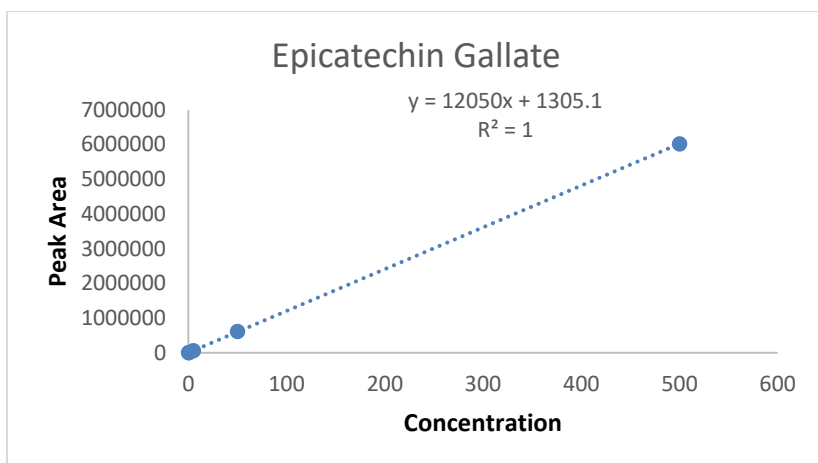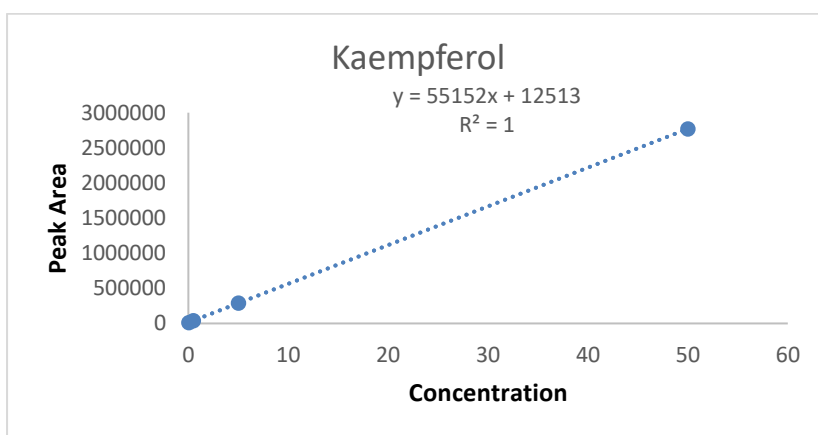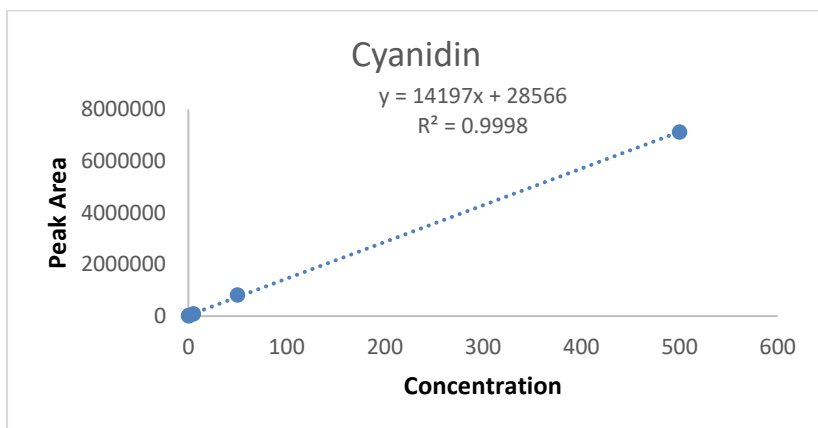

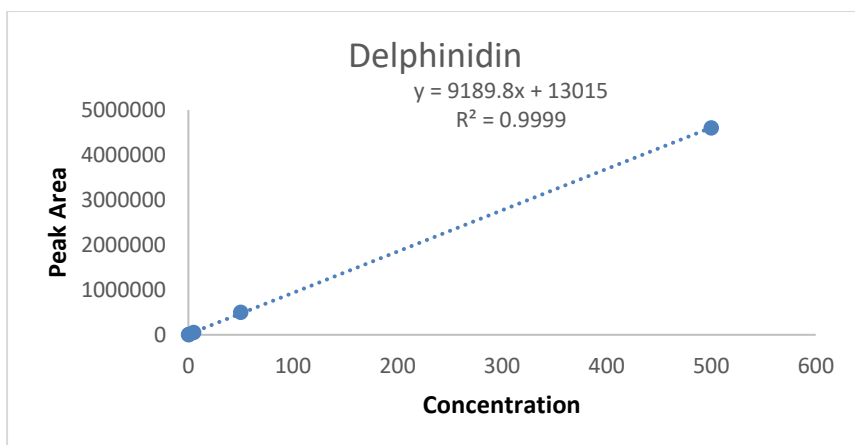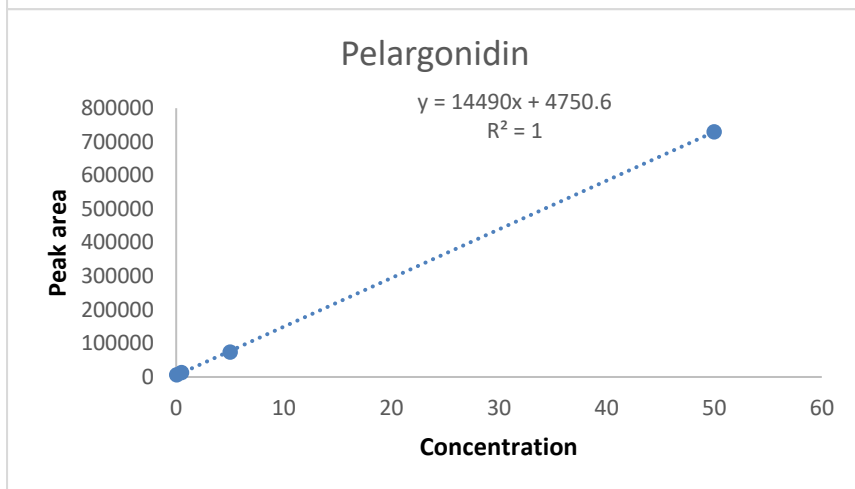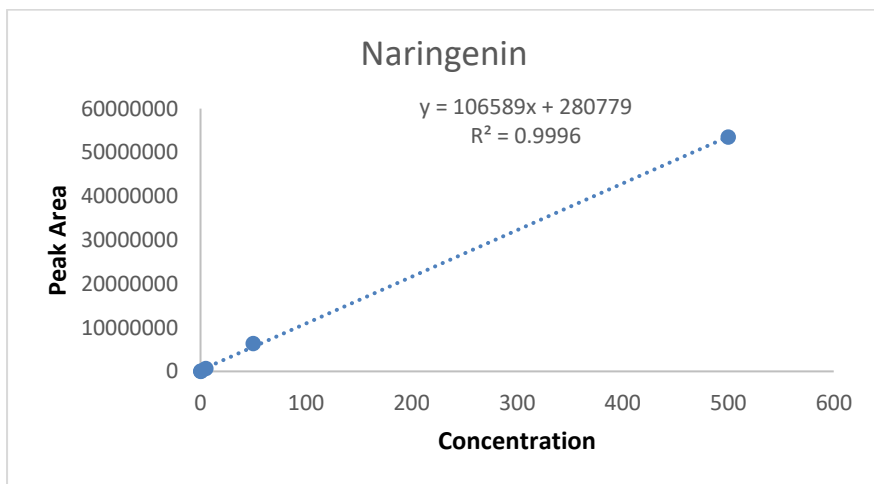

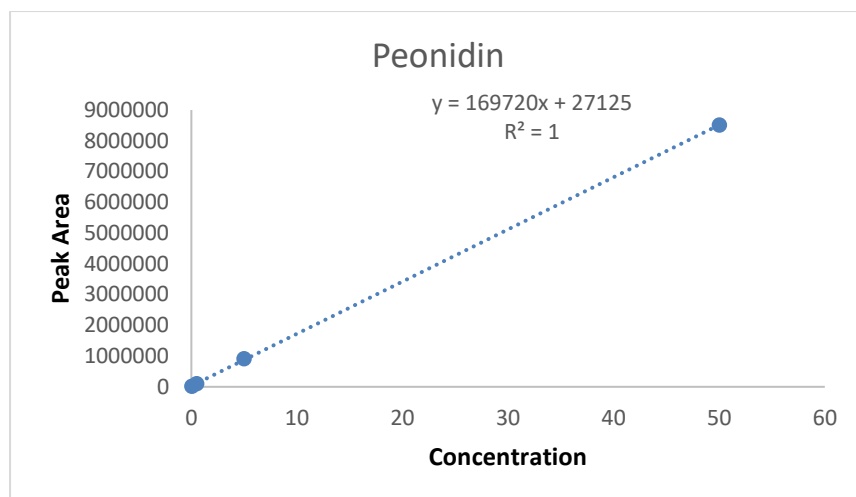

**Figure S2 –MS/MS chromatograms of different target flavonoids.**

## Naringenin-MS/MS

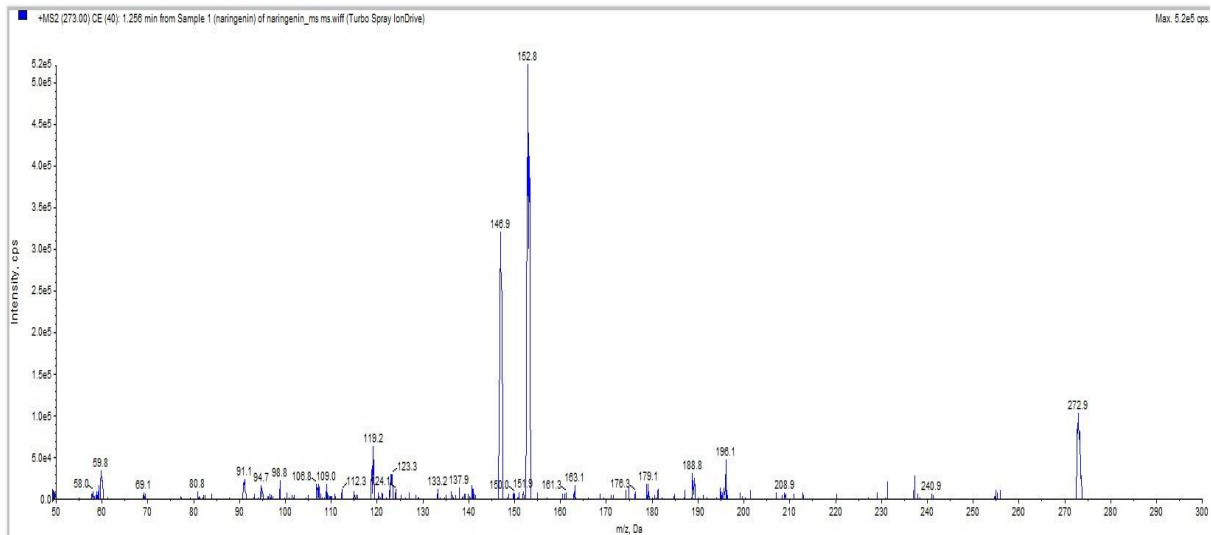

## Quercetin- MS/MS

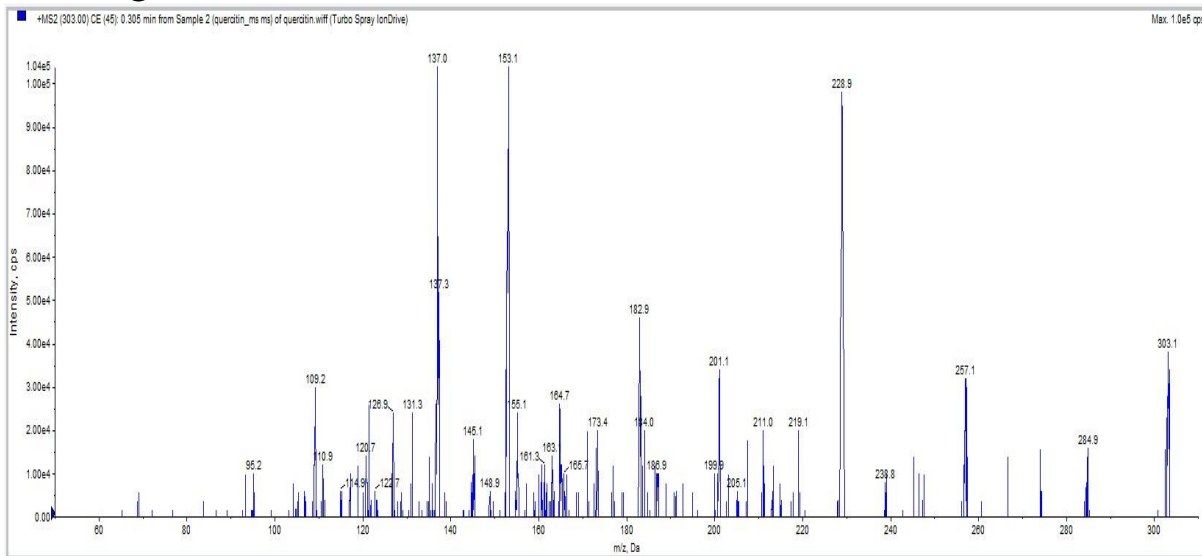

## Myricetin-MS/MS

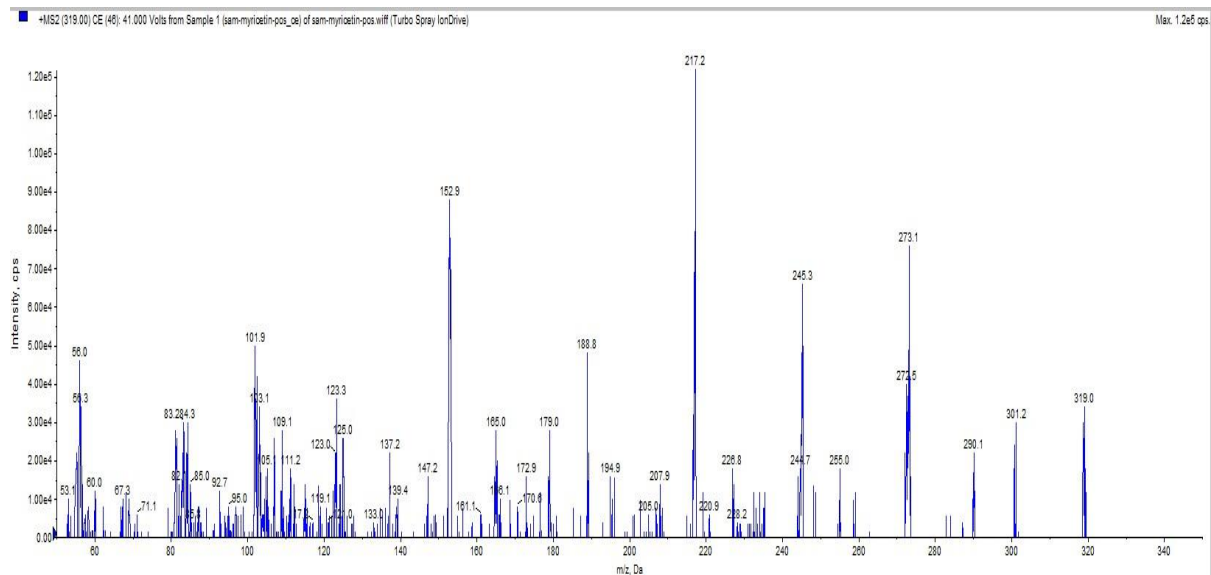

## Kaempferol-MS/MS

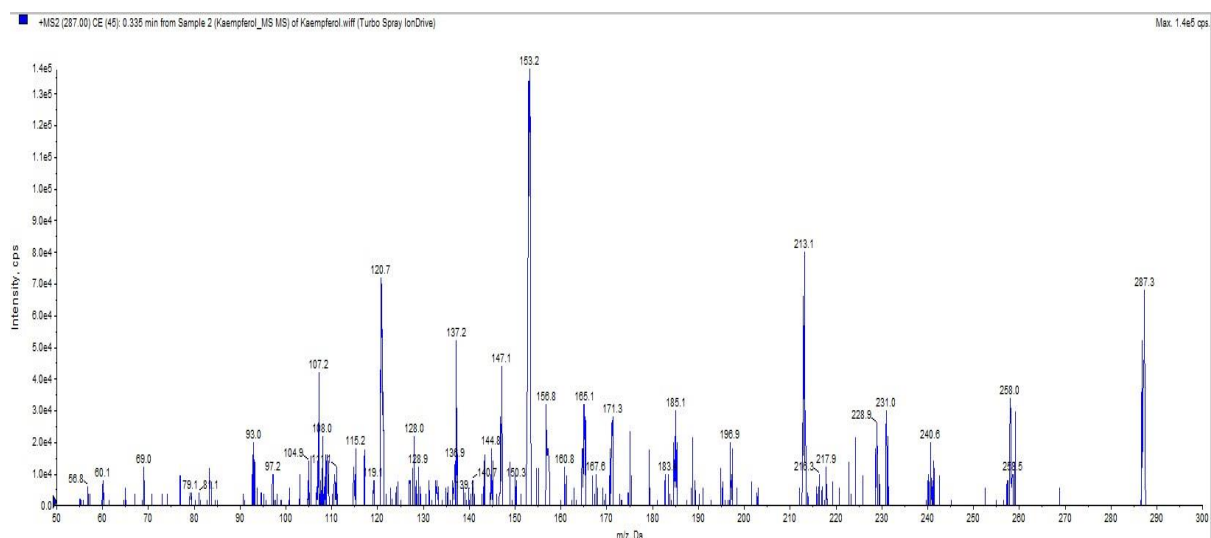

## Epigallocatechin-ms/ms

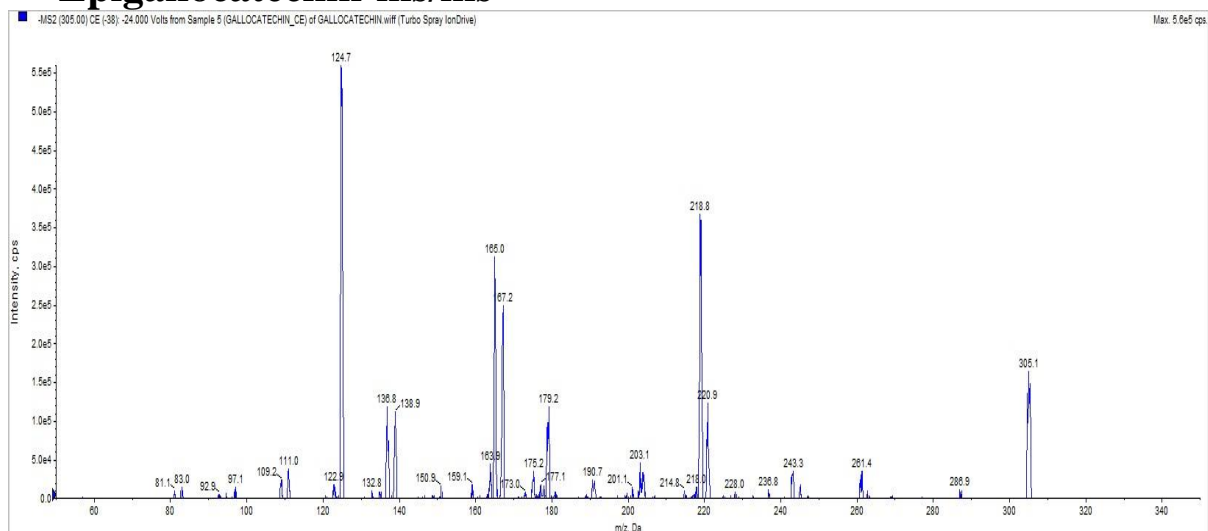

## Rutin-ms/ms

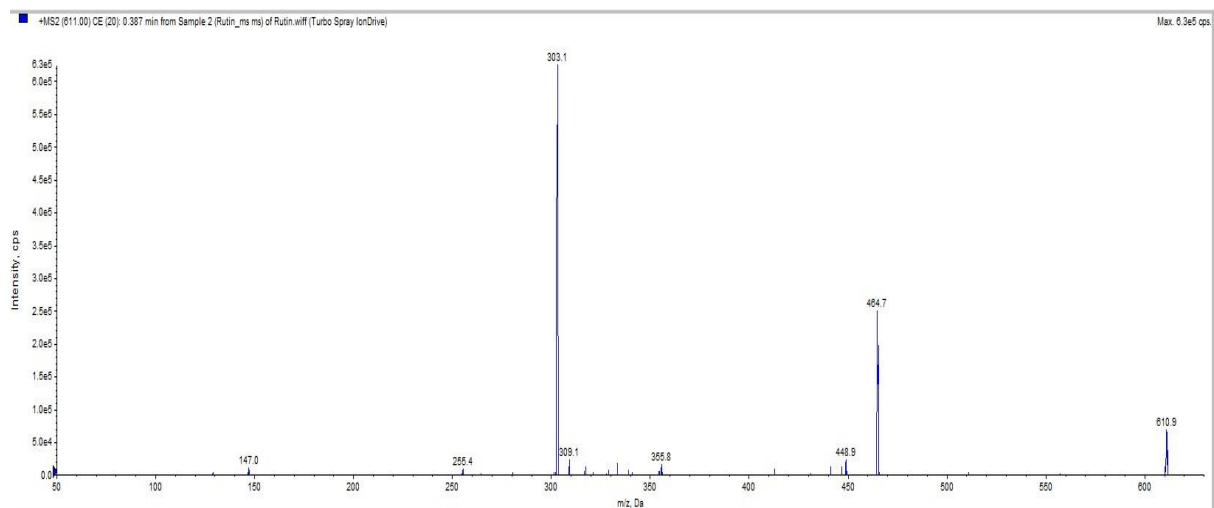

## Cyanidin-ms/ms

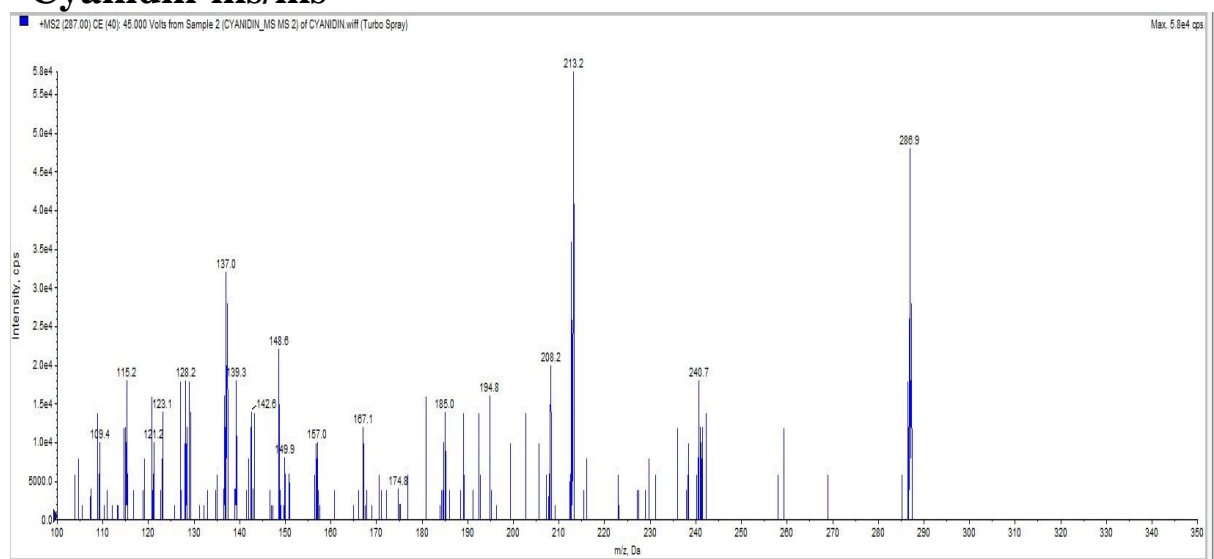

## Pelargonidin-MS/MS

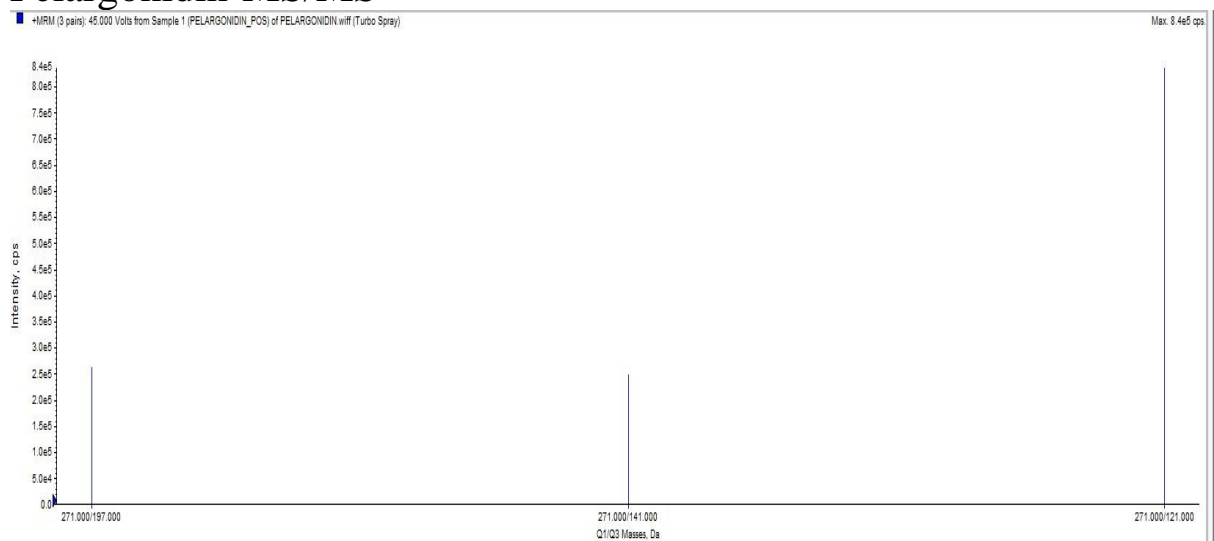

## Delphinidin- MS/MS

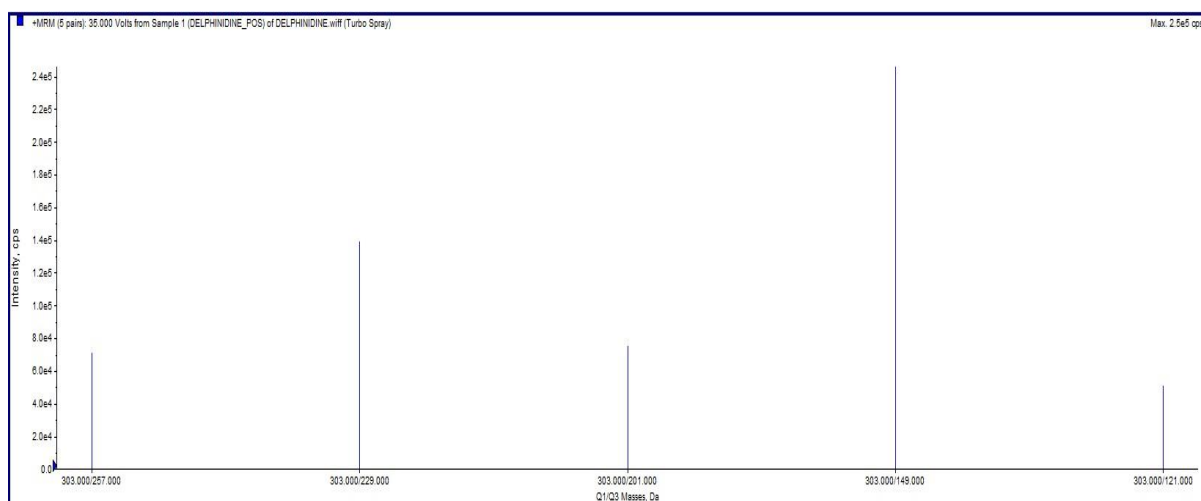

## Peonidin- MS/MS

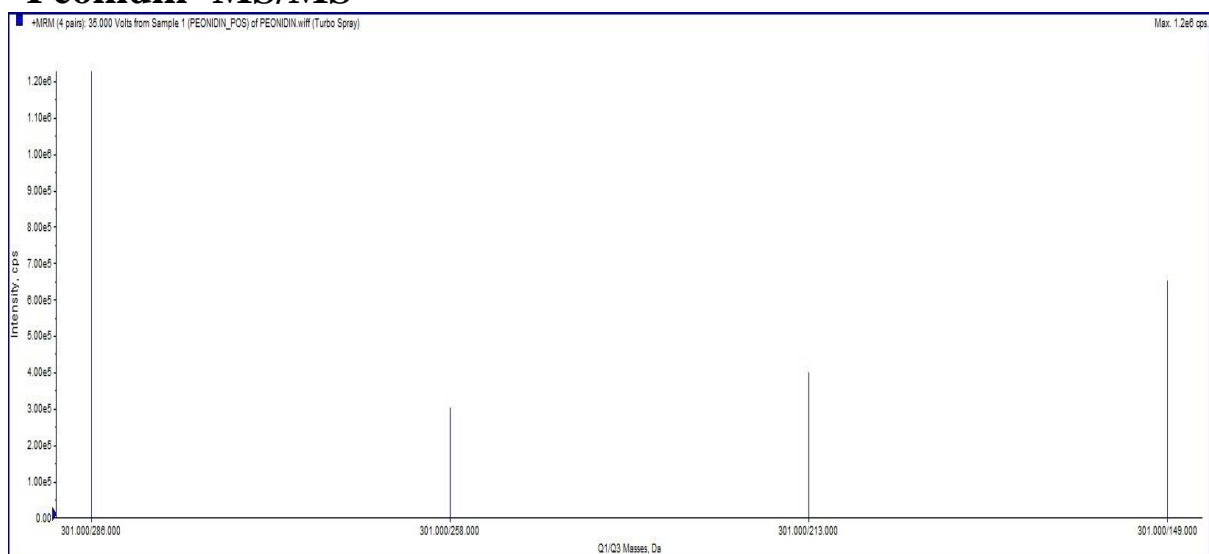

Supplement: s1 [file s1]
